# Supplementary material
Source: PubMed Central journal article supplement (PMC2206588)

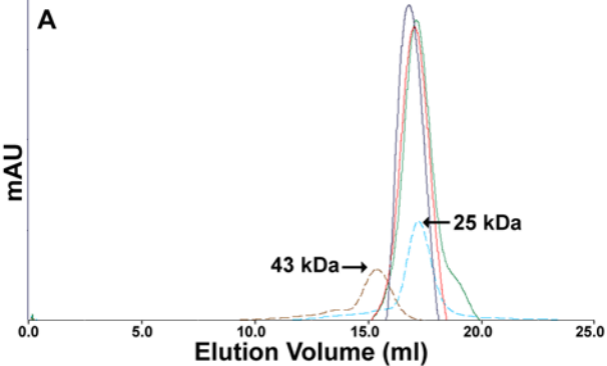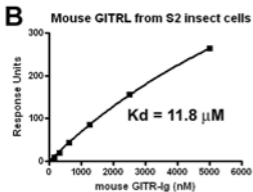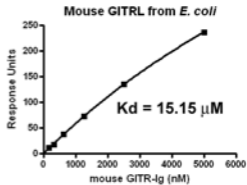

Supplement: pnas_0710529105_1.pdf [file pnas_0710529105_1.pdf]

**Mouse GITRL mutant (S59A-S60A-K62A)**

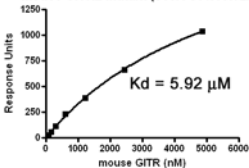

**Mouse GITRL mutant (K116A-N117A-D118A)**

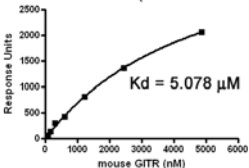

**Mouse GITRL mutant (Q155A-K156A-T157A)**

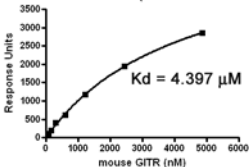

Supplement: pnas_0710529105_2.pdf [file pnas_0710529105_2.pdf]
